# Supplementary material
Source: Springer Nature journal article supplement (https://www.springermedizin.de/resource/supplementary/12875_2011_647_MOESM1_ESM.pdf/9434854)
Supplement: MOESM1 [file 9434854]

**TARGET POPULATION**

**STUDY POPULATION**  
Patients meeting eligibility criteria:  
-40 to 75 years, both genders  
-Dyslipemia

**Exclusion Criteria:**

- Secondary hypercholesterolemia.
- Familial high-density lipoprotein deficiency.
- CVD, Diabetes, COPD, severe liver disease, kidney disease
- Psychiatric disorders or substance abuse
- Prolonged sick leave.
- Pregnant or nursing.

**Randomization**  
48-50 General Practitioners  
(n=436 patients)

**Research Training Program**

**EXPERIMENTAL GROUP (24-25 GPs)**  
218 patients (8-10/doctor)  
Pre-inclusion interview (V-1)  
Initial assessment

**CONTROL GROUP (24-25 GPs)**  
218 patients (8-10/doctor)  
Pre-inclusion interview (V-1)  
Initial assessment

**Baseline assessment (V0)**  
Motivational Interviewing

**Baseline assessment (V0)**  
Usual intervention

**Follow-up, intervention and assessment**  
2, 4, 8, 12 months  
Degree of lipid level control and CV risk assessment

**Follow-up, intervention and assessment**  
2, 4, 8, 12 months  
Degree of lipid level control and CV risk assessment

**Data analysis**  
**Conclusions**

GPs: General Practices
